# Supplementary material
Source: Royal Society of Chemistry journal article supplement (doi:10.1039/d5nr04648c)
Supplement: d5nr04648c1.pdf [file d5nr04648c1.pdf]

## **Supplementary Information**

### **Compositional Control of the Effective Magnetic Anisotropy in Mn and Co Substituted Spinel Nanoparticles**

<sup>1</sup>Alexander Malaj, <sup>1</sup>Cathryn Leies, <sup>1</sup>Zachary Caprow, <sup>2</sup>Venkata Rohit Punyapu, <sup>3</sup>Ehimen A. Odion, <sup>2</sup>Rachel Getman, <sup>4</sup>Karen L Livesey, <sup>1</sup>Suvra S. Laha\* and <sup>1,3</sup> O. Thompson Mefford\*

<sup>1</sup>Department of Materials Science and Engineering, Clemson University, Clemson, SC 29634, USA

<sup>2</sup>William G. Lowrie Department of Chemical and Biomolecular Engineering, The Ohio State University, Columbus, OH 43210, USA

<sup>3</sup>Department of Chemistry, Clemson University, Clemson, SC 29634, USA

<sup>4</sup>School of Information and Physical Sciences, University of Newcastle, University Drive, Callaghan, 2308, NSW, Australia.

\*Corresponding authors: [slaha@clemson.edu](mailto:slaha@clemson.edu); [mefford@clemson.edu](mailto:mefford@clemson.edu)

#### **X-ray Diffraction (XRD) analysis**

X-ray diffraction (XRD) measurements were carried out using a Rigaku MiniFlex 600 benchtop diffractometer and a Rigaku SmartLab diffractometer. The XRD pattern for MM-1 was acquired using the MiniFlex 600 system. For subsequent samples (MM-2 to MM-7), measurements were performed using the Rigaku SmartLab diffractometer to obtain higher-resolution data. All measurements were conducted using Cu K<sub>α</sub> radiation ( $\lambda = 1.54 \text{ \AA}$ ). The XRD plots are shown in Fig. S1.

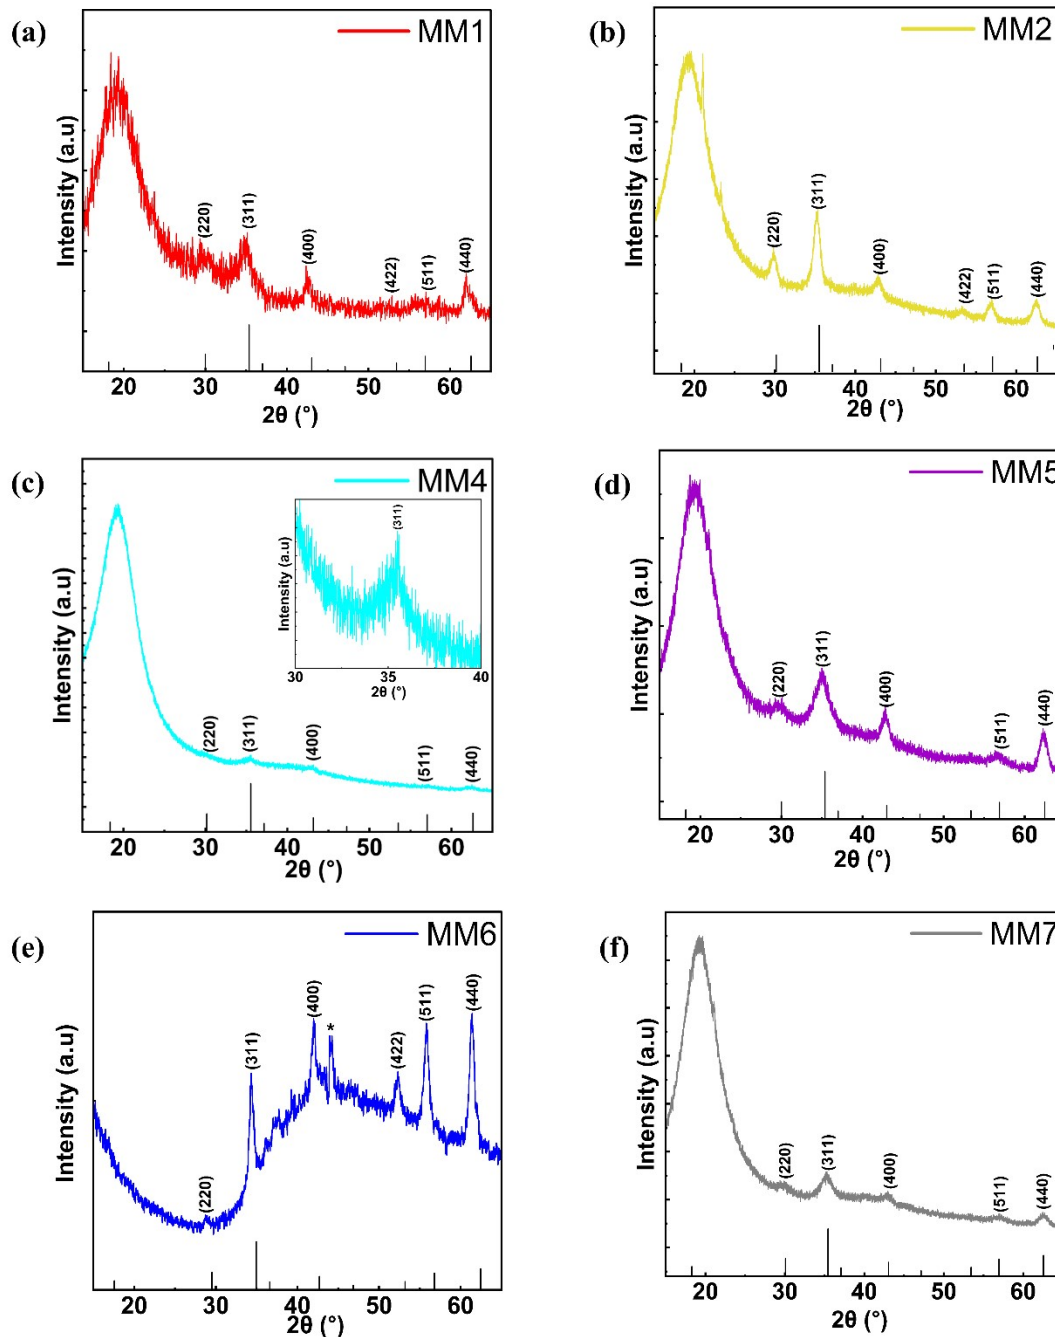

**Fig. S1.** X-ray diffraction (XRD) patterns of samples (a) MM-1, (b) MM-2, (c) MM-4, (d) MM-5, (e) MM-6, and (f) MM-7. All samples exhibit diffraction peaks corresponding to a cubic spinel ferrite structure. The peak positions closely match those of the magnetite crystal phase (JCPDS Card No. 85-1436), indicating that the synthesized nanoparticles adopt a typical spinel ferrite lattice despite the presence of multiple transition metal cations. A broad hump observed at low diffraction angles ( $\sim 15^\circ$ -  $25^\circ$ ) suggests the presence of an amorphous background, most likely associated with residual organic species in the thermal decomposition synthesis route. In MM6, an additional diffraction peak (marked with asterisks) is observed, which may originate from minor

impurity phases. Overall, the diffraction patterns confirm the formation of spinel ferrite nanoparticles across the sample series. The XRD pattern of MM-3 (not shown) did not display any distinct diffraction peaks, suggesting a largely amorphous or poorly crystalline phase.

**Table S1.** Table providing the mean and standard deviations for each nanoparticle series. The means and standard deviations for the volumes were calculated using a log-normal distribution. The mean blocking temperatures and the mean DC  $K_{\text{eff}}$  values are also included.

| <b>Sample</b> | <b>Mean diameter<br/>d (nm)</b> | <b>Standard dev<br/>diameter<br/>(nm)</b> | <b>Mean volume<br/>V (nm<sup>3</sup>)</b> | <b>Standard dev<br/>volume (nm<sup>3</sup>)</b> | <b>Mean blocking<br/>temp<br/>T<sub>B</sub> (K)</b> | <b>Mean DC<br/>K<sub>eff</sub><br/>(kJ/m<sup>3</sup>)</b> |
|---------------|---------------------------------|-------------------------------------------|-------------------------------------------|-------------------------------------------------|-----------------------------------------------------|-----------------------------------------------------------|
| <b>MM-1</b>   | 10.4                            | 1                                         | 606                                       | 178                                             | 134                                                 | 77                                                        |
| <b>MM-2</b>   | 10.6                            | 1.6                                       | 667                                       | 310                                             | 204                                                 | 130                                                       |
| <b>MM-3</b>   | 10.5                            | 1.3                                       | 634                                       | 240                                             | 112                                                 | 61                                                        |
| <b>MM-4</b>   | 9.58                            | 1.8                                       | 510                                       | 306                                             | 85                                                  | 57                                                        |
| <b>MM-5</b>   | 10                              | 1.56                                      | 566                                       | 278                                             | 71                                                  | 44                                                        |
| <b>MM-6</b>   | 8.8                             | 2.96                                      | 492                                       | 648                                             | 78                                                  | 55                                                        |
| <b>MM-7</b>   | 8.42                            | 1.1                                       | 328                                       | 133                                             | 38                                                  | 40                                                        |
